# Supplementary material for: Genome-wide profiling of Populus small RNAs
Source: Springer Nature journal article supplement (doi:10.1186/1471-2164-10-620), 2009-12-01

**First nucleotide of miRs  
matching mirbase**

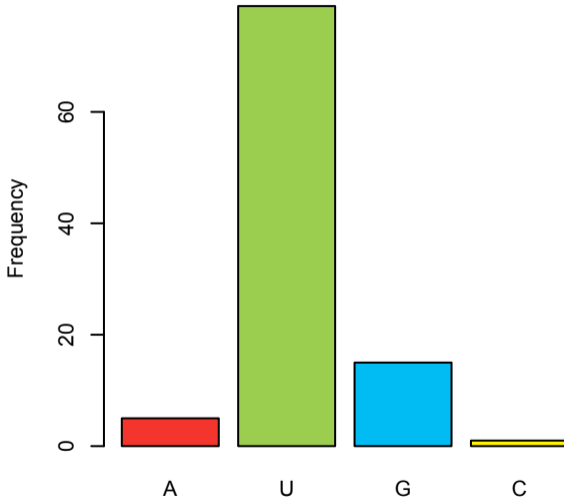

**First nucleotide of putative novel miRs  
with predicted targets**

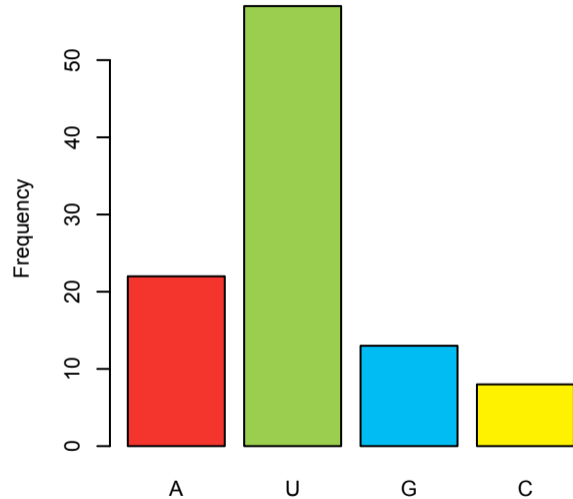

**First nucleotide of putative novel miRs  
without predicted targets**

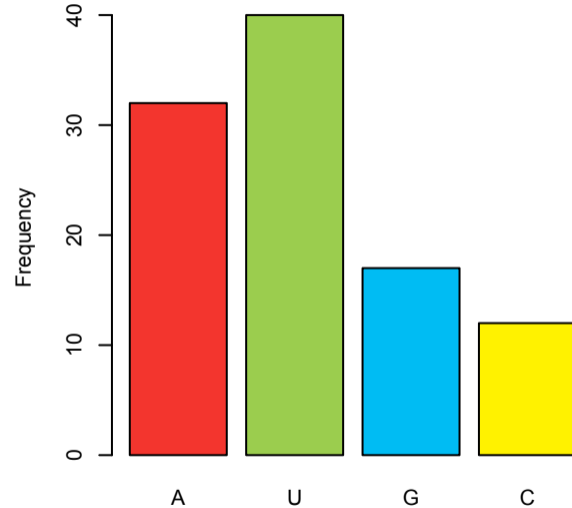

Supplement: Additional file 16 [file 1471-2164-10-620-s16.pdf]
